# Supplementary material for: Sorting nexin 24 genetic variation associates with coronary artery aneurysm severity in Kawasaki disease patients
Source: PubMed Central journal article supplement (PMC4176999; doi:10.1186/2045-3701-3-44), 2013-11-22
Supplement: 2045-3701-3-44-S1.pdf [file 2045-3701-3-44-S1.pdf]

**Table S1 Summary of the SNPs from *SNX* gene family associated with the CAA formation in Taiwanese Kawasaki disease**

| SNP        | Chromosome | Cytoband | Physical position | Nearest genes |    | CAA-       |           | CAA+           |                     |
|------------|------------|----------|-------------------|---------------|----|------------|-----------|----------------|---------------------|
|            |            |          |                   |               |    | No. (%)    | No. (%)   | <i>p</i> value | Odds ratio (95% CI) |
| rs2280737  | 2          | p23.3    | 27443314          | <i>SNX17</i>  | GG | 4 (2.2)    | 3 (4.0)   | 0.665          | 1.90 (0.41-8.76)    |
|            |            |          |                   |               | GA | 44 (24.2)  | 20 (26.3) |                | 1.15 (0.62-2.13)    |
|            |            |          |                   |               | AA | 134 (73.6) | 53 (69.7) |                | 1                   |
| rs17006049 | 2          | p23.3    | 27465746          | <i>SNX17</i>  | AA | 0 (0.0)    | 0 (0.0)   | 0.861          | ND                  |
|            |            |          |                   |               | AG | 26 (14.0)  | 10 (13.2) |                | 0.93 (0.43-2.04)    |
|            |            |          |                   |               | GG | 160 (86.0) | 66 (86.8) |                | 1                   |
| rs217132   | 6          | q21      | 108662892         | <i>SNX3</i>   | AA | 4 (2.1)    | 1 (1.3)   | 0.878          | 0.62 (0.07-5.63)    |
|            |            |          |                   |               | AG | 34 (18.3)  | 15 (19.7) |                | 1.09 (0.55-2.14)    |
|            |            |          |                   |               | GG | 148 (79.6) | 60 (79.0) |                | 1                   |
| rs3800223  | 6          | q21      | 108679188         | <i>SNX3</i>   | AA | 27 (14.5)  | 17 (22.4) | 0.300          | 1.74 (0.82-3.71)    |
|            |            |          |                   |               | AT | 87 (46.8)  | 33 (43.4) |                | 1.05 (0.58-1.92)    |
|            |            |          |                   |               | TT | 72 (38.7)  | 26 (34.2) |                | 1                   |
| rs9398166  | 6          | q21      | 108686901         | <i>SNX3</i>   | GG | 6 (3.3)    | 2 (2.6)   | 0.519          | 0.89 (0.17-4.57)    |
|            |            |          |                   |               | GT | 46 (24.7)  | 24 (31.6) |                | 1.40 (0.77-2.52)    |
|            |            |          |                   |               | TT | 134 (72.0) | 50 (65.8) |                | 1                   |
| rs972158   | 7          | p15.2    | 26301532          | <i>SNX10</i>  | AA | 19 (10.2)  | 7 (9.2)   | 0.902          | 0.85 (0.33-2.19)    |
|            |            |          |                   |               | AC | 82 (44.1)  | 32 (42.1) |                | 0.90 (0.51-1.57)    |
|            |            |          |                   |               | CC | 85 (45.7)  | 37 (48.7) |                | 1                   |
| rs12671122 | 7          | p15.2    | 26335810          | <i>SNX10</i>  | AA | 5 (2.7)    | 5 (6.7)   | 0.136          | 2.98 (0.82-10.8)    |
|            |            |          |                   |               | AC | 59 (31.7)  | 29 (38.7) |                | 1.46 (0.83-2.58)    |
|            |            |          |                   |               | CC | 122 (65.6) | 41 (54.6) |                | 1                   |
| rs10252532 | 7          | p15.2    | 26346177          | <i>SNX10</i>  | CC | 32 (17.2)  | 24 (31.6) | 0.036          | 2.21 (1.03-4.73)    |
|            |            |          |                   |               | CT | 104 (55.9) | 35 (46.1) |                | 0.99 (0.51-1.94)    |
|            |            |          |                   |               | TT | 50 (26.9)  | 17 (22.4) |                | 1                   |
| rs3801890  | 7          | p15.2    | 26352679          | <i>SNX10</i>  | GG | 34 (18.4)  | 24 (31.6) | 0.066          | 1.99 (0.93-4.27)    |
|            |            |          |                   |               | GA | 103 (55.7) | 35 (46.0) |                | 0.96 (0.49-1.88)    |
|            |            |          |                   |               | AA | 48 (25.9)  | 17 (22.4) |                | 1                   |
| rs1534696  | 7          | p15.2    | 26363764          | <i>SNX10</i>  | CC | 6 (3.2)    | 1 (1.3)   | 0.684          | 0.40 (0.05-3.40)    |
|            |            |          |                   |               | CA | 58 (31.2)  | 24 (31.6) |                | 0.99 (0.56-1.76)    |
|            |            |          |                   |               | AA | 122 (65.6) | 51 (67.1) |                | 1                   |
| rs1463259  | 8          | q21.13   | 82900300          | <i>SNX16</i>  | GG | 19 (10.2)  | 10 (13.1) | 0.208          | 1.78 (0.73-4.37)    |
|            |            |          |                   |               | GA | 89 (47.9)  | 43 (56.6) |                | 1.64 (0.91-2.96)    |
|            |            |          |                   |               | AA | 78 (41.9)  | 23 (30.3) |                | 1                   |
| rs12677458 | 8          | q21.13   | 82900341          | <i>SNX16</i>  | TT | 3 (1.6)    | 2 (2.7)   | 0.724          | 1.76 (0.29-10.81)   |
|            |            |          |                   |               | TC | 44 (23.9)  | 20 (27.0) |                | 1.20 (0.65-2.22)    |
|            |            |          |                   |               | CC | 137 (74.5) | 52 (70.3) |                | 1                   |
| rs7164156  | 15         | q22.31   | 62226620          | <i>SNX22</i>  | TT | 7 (3.8)    | 3 (4.0)   | 0.245          | 1.22 (0.30-4.92)    |
|            |            |          |                   |               | CC | 45 (24.2)  | 26 (34.2) |                | 1.65 (0.92-2.96)    |
|            |            |          |                   |               | CC | 134 (72.0) | 47 (61.8) |                | 1                   |
| rs8032157  | 15         | q22.31   | 62267941          | <i>SNX22</i>  | TT | 8 (4.3)    | 5 (6.6)   | 0.730          | 1.54 (0.48-4.94)    |
|            |            |          |                   |               | TC | 65 (34.9)  | 25 (32.9) |                | 0.94 (0.53-1.68)    |
|            |            |          |                   |               | CC | 113 (60.8) | 46 (60.5) |                | 1                   |
| rs442332   | 16         | p13.13   | 11979625          | <i>SNX29</i>  | GG | 1 (0.5)    | 0 (0.0)   | 0.791          | ND                  |
|            |            |          |                   |               | GA | 20 (10.8)  | 9 (11.8)  |                | 1.11 (0.48-2.56)    |
|            |            |          |                   |               | AA | 165 (88.7) | 67 (88.2) |                | 1                   |
| rs8045739  | 16         | p13.13   | 11985760          | <i>SNX29</i>  | GG | 16 (8.6)   | 3 (4.0)   | 0.420          | 0.43 (0.12-1.56)    |
|            |            |          |                   |               | GT | 63 (34.1)  | 26 (34.7) |                | 0.95 (0.54-1.69)    |
|            |            |          |                   |               | TT | 106 (57.3) | 46 (61.3) |                | 1                   |
| rs7189138  | 16         | p13.13   | 11990846          | <i>SNX29</i>  | AA | 1 (0.5)    | 0 (0.0)   | 0.731          | ND                  |
|            |            |          |                   |               | AG | 16 (8.7)   | 8 (10.5)  |                | 1.24 (0.51-3.02)    |
|            |            |          |                   |               | GG | 168 (90.8) | 68 (89.5) |                | 1                   |
| rs11639821 | 16         | p13.13   | 12000076          | <i>SNX29</i>  | TT | 0 (0.0)    | 0 (0.0)   | 0.387          | ND                  |
|            |            |          |                   |               | TC | 22 (11.8)  | 12 (15.8) |                | 1.40 (0.65-2.99)    |
|            |            |          |                   |               | CC | 164 (88.2) | 64 (84.2) |                | 1                   |
| rs8045634  | 16         | p13.13   | 12026752          | <i>SNX29</i>  | GG | 6 (3.2)    | 3 (3.9)   | 0.945          | 1.25 (0.30-5.18)    |
|            |            |          |                   |               | GT | 45 (24.2)  | 19 (25.0) |                | 1.06 (0.57-1.97)    |
|            |            |          |                   |               | TT | 135 (72.6) | 54 (71.1) |                | 1                   |
| rs2865105  | 16         | p13.13   | 12035270          | <i>SNX29</i>  | AA | 2 (1.1)    | 0 (0.0)   | 0.656          | ND                  |
|            |            |          |                   |               | AC | 18 (9.7)   | 7 (9.2)   |                | 0.94 (0.37-2.34)    |
|            |            |          |                   |               | CC | 166 (89.2) | 69 (90.8) |                | 1                   |
| rs8051298  | 16         | p13.13   | 12045569          | <i>SNX29</i>  | AA | 2 (1.1)    | 0 (0.0)   | 0.624          | ND                  |
|            |            |          |                   |               | AC | 17 (9.1)   | 6 (7.9)   |                | 0.84 (0.32-2.22)    |
|            |            |          |                   |               | CC | 167 (89.8) | 70 (92.1) |                | 1                   |
| rs7202124  | 16         | q12.1    | 49271530          | <i>SNX20</i>  | AA | 3 (1.6)    | 2 (2.6)   | 0.656          | 1.57 (0.26-9.63)    |
|            |            |          |                   |               | AG | 37 (19.9)  | 12 (15.8) |                | 0.76 (0.37-1.56)    |
|            |            |          |                   |               | GG | 146 (78.5) | 62 (81.6) |                | 1                   |

|           |    |        |          |       |    |            |           |       |                   |
|-----------|----|--------|----------|-------|----|------------|-----------|-------|-------------------|
| rs8066529 | 17 | q21.32 | 43542564 | SNX11 | CC | 0 (0.0)    | 0 (0.0)   | 0.127 | ND                |
|           |    |        |          |       | CT | 28 (15.2)  | 6 (8.1)   |       | 0.49 (0.19-1.24)  |
|           |    |        |          |       | TT | 156 (84.8) | 68 (91.9) |       | 1                 |
| rs8080662 | 17 | q21.32 | 43545818 | SNX11 | CC | 4 (2.2)    | 6 (7.9)   | 0.042 | 3.45 (0.93-12.76) |
|           |    |        |          |       | CT | 67 (36.0)  | 20 (26.3) |       | 0.69 (0.38-1.25)  |
|           |    |        |          |       | TT | 115 (61.8) | 50 (65.8) |       | 1                 |
| rs9890691 | 17 | q21.32 | 43547935 | SNX11 | GG | 4 (2.2)    | 6 (7.9)   | 0.042 | 3.45 (0.93-12.76) |
|           |    |        |          |       | GT | 67 (36.0)  | 20 (26.3) |       | 0.69 (0.38-1.25)  |
|           |    |        |          |       | TT | 115 (61.8) | 50 (65.8) |       | 1                 |
| rs8071199 | 17 | q21.32 | 43550334 | SNX11 | AA | 4 (2.2)    | 6 (7.9)   | 0.042 | 3.45 (0.93-12.76) |
|           |    |        |          |       | AT | 67 (36.0)  | 20 (26.3) |       | 0.69 (0.38-1.25)  |
|           |    |        |          |       | TT | 115 (61.8) | 50 (65.8) |       | 1                 |
| rs386155  | 20 | q13.12 | 43892590 | SNX21 | TT | 27 (14.5)  | 8 (10.5)  | 0.630 | 0.65 (0.27-1.58)  |
|           |    |        |          |       | TC | 89 (47.9)  | 36 (47.4) |       | 0.88 (0.50-1.56)  |
|           |    |        |          |       | CC | 70 (37.6)  | 32 (42.1) |       | 1                 |
| rs3746495 | 20 | q13.12 | 43913201 | SNX21 | CC | 3 (1.6)    | 2 (2.6)   | 0.766 | 1.60 (0.26-9.79)  |
|           |    |        |          |       | CT | 37 (19.9)  | 13 (17.1) |       | 0.84 (0.42-1.69)  |
|           |    |        |          |       | TT | 146 (78.5) | 61 (80.3) |       | 1                 |

SNX24, sorting nexin 24; SNP, single nucleotide polymorphism; CAA, Coronary artery aneurysm; CI, confidence interval; ND, not determined.

*p*-values were obtained by chi-square test.

Bold, emphasizing statistical significance was considered as *p* value <0.002 (0.05/28).

**Table S2** Haplotype distributions of *SNX24* gene SNPs associated with the CAA formation in Taiwanese KD patients

| Chromosome | Physical position 1 | Physical position 2 | SNP1      | SNP2    | Haplotype | Frequency_CAA+ | Frequency_CAA- | Odds ratio | <i>p</i> value |
|------------|---------------------|---------------------|-----------|---------|-----------|----------------|----------------|------------|----------------|
| 5          | 122228806           | 122311523           | rs154507  | rs28891 | CC        | 32.9%          | 47.6%          | 0.522      | <b>0.002</b>   |
| 5          | 122228806           | 122311523           | rs154507  | rs28891 | GT        | 45.4%          | 37.6%          | 1.41       | 0.091          |
| 5          | 122228806           | 122311523           | rs154507  | rs28891 | CT        | 21.7%          | 14.8%          | 1.55       | 0.066          |
| 5          | 122232671           | 122311523           | rs27740   | rs28891 | AC        | 32.9%          | 47.6%          | 0.522      | <b>0.002</b>   |
| 5          | 122232671           | 122311523           | rs27740   | rs28891 | TT        | 45.4%          | 37.6%          | 1.41       | 0.091          |
| 5          | 122232671           | 122311523           | rs27740   | rs28891 | AT        | 21.7%          | 14.8%          | 1.55       | 0.066          |
| 5          | 122234424           | 122311523           | rs26371   | rs28891 | TC        | 32.9%          | 47.0%          | 0.551      | <b>0.004</b>   |
| 5          | 122234424           | 122311523           | rs26371   | rs28891 | TT        | 7.9%           | 3.8%           | 2.16       | 0.058          |
| 5          | 122234424           | 122311523           | rs26371   | rs28891 | CT        | 59.2%          | 49.2%          | 1.58       | 0.025          |
| 5          | 122234657           | 122311523           | rs6595415 | rs28891 | CC        | 32.9%          | 47.6%          | 0.522      | <b>0.002</b>   |
| 5          | 122234657           | 122311523           | rs6595415 | rs28891 | TT        | 44.7%          | 36.6%          | 1.42       | 0.079          |
| 5          | 122234657           | 122311523           | rs6595415 | rs28891 | CT        | 22.4%          | 15.9%          | 1.46       | 0.098          |

SNX24, sorting nexin 24; SNP, single nucleotide polymorphism; CAA, Coronary artery aneurysm; CI, confidence interval.

*p*-values were obtained by chi-square test.

Statistical significance was considered as *p* value <0.0042 (0.05/12).

**Table S3 Genotype distributions of *SNX24* gene SNPs in Taiwanese male and female KD patients**

| SNP        | Chromosome | Cytoband | Physical position | Nearest genes |    | Female    |           | Male           |                     |
|------------|------------|----------|-------------------|---------------|----|-----------|-----------|----------------|---------------------|
|            |            |          |                   |               |    | No. (%)   | No. (%)   | <i>p</i> value | Odds ratio (95% CI) |
| rs154507   | 5          | q23.2    | 122228806         | <i>SNX24</i>  | GG | 13 (14.8) | 25 (14.4) | 0.985          | 0.99 (0.45-2.21)    |
|            |            |          |                   |               | GC | 44 (50.0) | 89 (51.1) |                | 1.05 (0.59-1.84)    |
|            |            |          |                   |               | CC | 31 (35.2) | 60 (34.5) |                | 1                   |
| rs27740    | 5          | q23.2    | 122232671         | <i>SNX24</i>  | TT | 13 (14.8) | 25 (14.4) | 0.985          | 0.99 (0.45-2.21)    |
|            |            |          |                   |               | TA | 44 (50.0) | 89 (51.1) |                | 1.05 (0.59-1.84)    |
|            |            |          |                   |               | AA | 31 (35.2) | 60 (34.5) |                | 1                   |
| rs26371    | 5          | q23.2    | 122234424         | <i>SNX24</i>  | TT | 18 (20.5) | 35 (20.1) | 0.629          | 0.80 (0.37-1.72)    |
|            |            |          |                   |               | TC | 49 (55.7) | 88 (50.6) |                | 0.74 (0.40-1.37)    |
|            |            |          |                   |               | CC | 21 (23.9) | 51 (29.3) |                | 1                   |
| rs6595415  | 5          | q23.2    | 122234657         | <i>SNX24</i>  | TT | 12 (13.6) | 26 (14.9) | 0.948          | 1.08 (0.48-2.42)    |
|            |            |          |                   |               | TC | 44 (50.0) | 84 (48.3) |                | 0.95 (0.55-1.67)    |
|            |            |          |                   |               | CC | 32 (36.4) | 64 (36.8) |                | 1                   |
| rs17149732 | 5          | q23.2    | 122249811         | <i>SNX24</i>  | TT | 12 (13.6) | 25 (14.4) | 0.980          | 1.04 (0.46-2.34)    |
|            |            |          |                   |               | TG | 44 (50.0) | 85 (48.9) |                | 0.97 (0.55-1.69)    |
|            |            |          |                   |               | GG | 32 (36.4) | 64 (36.8) |                | 1                   |
| rs17149748 | 5          | q23.2    | 122295266         | <i>SNX24</i>  | CC | 12 (13.8) | 25 (14.4) | 0.940          | 0.99 (0.44-2.24)    |
|            |            |          |                   |               | CT | 45 (51.7) | 86 (49.4) |                | 0.91 (0.52-1.60)    |
|            |            |          |                   |               | TT | 30 (34.5) | 63 (36.2) |                | 1                   |
| rs1038078  | 5          | q23.2    | 122309550         | <i>SNX24</i>  | AA | 12 (13.6) | 25 (14.4) | 0.941          | 1.01 (0.45-2.27)    |
|            |            |          |                   |               | AG | 45 (51.1) | 85 (48.9) |                | 0.91 (0.52-1.60)    |
|            |            |          |                   |               | GG | 31 (35.2) | 64 (36.8) |                | 1                   |
| rs28891    | 5          | q23.2    | 122311523         | <i>SNX24</i>  | CC | 15 (17.0) | 32 (18.4) | 0.830          | 0.99 (0.46-2.14)    |
|            |            |          |                   |               | CT | 47 (53.4) | 86 (49.4) |                | 0.85 (0.47-1.53)    |
|            |            |          |                   |               | TT | 26 (29.5) | 56 (32.2) |                | 1                   |
| rs6595423  | 5          | q23.2    | 122341433         | <i>SNX24</i>  | CC | 11 (12.5) | 25 (14.4) | 0.899          | 1.14 (0.50-2.60)    |
|            |            |          |                   |               | CT | 45 (51.1) | 85 (48.9) |                | 0.94 (0.54-1.65)    |
|            |            |          |                   |               | TT | 32 (36.4) | 64 (36.8) |                | 1                   |

*SNX24*, sorting nexin 24; SNP, single nucleotide polymorphism; CAA, Coronary artery aneurysm; CI, confidence interval.

*p*-values were obtained by chi-square test.

Statistical significance was considered as *p* value <0.006 (0.05/9).

**Table S4 Genotype distributions of *SNX24* gene SNPs in Taiwanese male KD patients**

| SNP        | Chromosome | Cytoband | Physical position | Nearest genes |    | All male patients | CAA-      | CAA+      | <i>p</i> value | Odds ratio (95% CI) |                  |
|------------|------------|----------|-------------------|---------------|----|-------------------|-----------|-----------|----------------|---------------------|------------------|
|            |            |          |                   |               |    | No. (%)           | No. (%)   | No. (%)   |                |                     |                  |
| rs154507   | 5          | q23.2    | 122228806         | <i>SNX24</i>  | GG | 25 (14.4)         | 14 (11.7) | 11 (20.4) | 0.316          | 1.99 (0.75-5.24)    |                  |
|            |            |          |                   |               | GC | 89 (51.1)         | 63 (52.5) | 26 (48.1) |                |                     | 1.04 (0.51-2.15) |
|            |            |          |                   |               | CC | 60 (34.5)         | 43 (35.8) | 17 (31.5) |                |                     | 1                |
| rs27740    | 5          | q23.2    | 122232671         | <i>SNX24</i>  | TT | 25 (14.4)         | 14 (11.7) | 11 (20.4) | 0.316          | 1.99 (0.75-5.24)    |                  |
|            |            |          |                   |               | TA | 89 (51.1)         | 63 (52.5) | 26 (48.1) |                |                     | 1.04 (0.51-2.15) |
|            |            |          |                   |               | AA | 60 (34.5)         | 43 (35.8) | 17 (31.5) |                |                     | 1                |
| rs26371    | 5          | q23.2    | 122234424         | <i>SNX24</i>  | TT | 35 (20.1)         | 25 (20.8) | 10 (18.5) | 0.521          | 0.67 (0.27-1.70)    |                  |
|            |            |          |                   |               | TC | 88 (50.6)         | 63 (52.5) | 25 (46.3) |                |                     | 0.67 (0.32-1.39) |
|            |            |          |                   |               | CC | 51 (29.3)         | 32 (26.7) | 19 (35.2) |                |                     | 1                |
| rs6595415  | 5          | q23.2    | 122234657         | <i>SNX24</i>  | TT | 26 (14.9)         | 14 (11.7) | 12 (22.2) | 0.187          | 2.03 (0.79-5.19)    |                  |
|            |            |          |                   |               | TC | 84 (48.3)         | 61 (50.8) | 23 (42.6) |                |                     | 0.89 (0.43-1.83) |
|            |            |          |                   |               | CC | 64 (36.8)         | 45 (37.5) | 19 (35.2) |                |                     | 1                |
| rs17149732 | 5          | q23.2    | 122249811         | <i>SNX24</i>  | TT | 25 (14.4)         | 14 (11.7) | 11 (20.4) | 0.312          | 1.86 (0.72-4.83)    |                  |
|            |            |          |                   |               | TG | 85 (48.9)         | 61 (50.8) | 24 (44.4) |                |                     | 0.93 (0.46-1.90) |
|            |            |          |                   |               | GG | 64 (36.8)         | 45 (37.5) | 19 (35.2) |                |                     | 1                |
| rs17149748 | 5          | q23.2    | 122295266         | <i>SNX24</i>  | CC | 25 (14.4)         | 14 (11.7) | 11 (20.4) | 0.317          | 1.96 (0.75-5.13)    |                  |
|            |            |          |                   |               | CT | 86 (49.4)         | 61 (50.8) | 25 (46.3) |                |                     | 1.02 (0.50-2.10) |
|            |            |          |                   |               | TT | 63 (36.2)         | 45 (37.5) | 18 (33.3) |                |                     | 1                |
| rs1038078  | 5          | q23.2    | 122309550         | <i>SNX24</i>  | AA | 25 (14.4)         | 14 (11.7) | 11 (20.4) | 0.312          | 1.86 (0.72-4.83)    |                  |
|            |            |          |                   |               | AG | 85 (48.9)         | 61 (50.8) | 24 (44.4) |                |                     | 0.93 (0.46-1.90) |
|            |            |          |                   |               | GG | 64 (36.8)         | 45 (37.5) | 19 (35.2) |                |                     | 1                |
| rs28891    | 5          | q23.2    | 122311523         | <i>SNX24</i>  | CC | 32 (18.4)         | 25 (20.8) | 7 (13.0)  | 0.059          | 0.37 (0.14-1.01)    |                  |
|            |            |          |                   |               | CT | 86 (49.4)         | 63 (52.5) | 23 (42.6) |                |                     | 0.49 (0.24-0.99) |
|            |            |          |                   |               | TT | 56 (32.2)         | 32 (26.7) | 24 (44.4) |                |                     | 1                |
| rs6595423  | 5          | q23.2    | 122341433         | <i>SNX24</i>  | CC | 25 (14.4)         | 14 (11.7) | 11 (20.4) | 0.312          | 1.86 (0.72-4.83)    |                  |
|            |            |          |                   |               | CT | 85 (48.9)         | 61 (50.8) | 24 (44.4) |                |                     | 0.93 (0.46-1.90) |
|            |            |          |                   |               | TT | 64 (36.8)         | 45 (37.5) | 19 (35.2) |                |                     | 1                |

*SNX24*, sorting nexin 24; SNP, single nucleotide polymorphism; CAA, Coronary artery aneurysm; CI, confidence interval.

*p*-values were obtained by chi-square test.

Statistical significance was considered as *p* value <0.006 (0.05/9).

**Table S5 Genotype distributions of *SNX24* gene SNPs in Taiwanese female KD patients**

| SNP        | Chromosome | Cytoband | Physical position | Nearest genes |    | All female patients | CAA-      | CAA+      | <i>p</i> value | Odds ratio (95% CI) |                   |
|------------|------------|----------|-------------------|---------------|----|---------------------|-----------|-----------|----------------|---------------------|-------------------|
|            |            |          |                   |               |    | No. (%)             | No. (%)   | No. (%)   |                |                     |                   |
| rs154507   | 5          | q23.2    | 122228806         | <i>SNX24</i>  | GG | 13 (14.8)           | 10 (15.2) | 3 (13.6)  | 0.112          | 2.03 (0.38-10.69)   |                   |
|            |            |          |                   |               | GC | 44 (50.0)           | 29 (43.9) | 15 (68.2) |                |                     | 3.49 (1.03-11.84) |
|            |            |          |                   |               | CC | 31 (35.2)           | 27 (40.9) | 4 (18.2)  |                |                     | 1                 |
| rs27740    | 5          | q23.2    | 122232671         | <i>SNX24</i>  | TT | 13 (14.8)           | 10 (15.2) | 3 (13.6)  | 0.112          | 2.03 (0.38-10.69)   |                   |
|            |            |          |                   |               | TA | 44 (50.0)           | 29 (43.9) | 15 (68.2) |                |                     | 3.49 (1.03-11.84) |
|            |            |          |                   |               | AA | 31 (35.2)           | 27 (40.9) | 4 (18.2)  |                |                     | 1                 |
| rs26371    | 5          | q23.2    | 122234424         | <i>SNX24</i>  | TT | 18 (20.5)           | 11 (16.7) | 7 (31.8)  | 0.100          | 6.05 (1.06-34.38)   |                   |
|            |            |          |                   |               | TC | 49 (55.7)           | 36 (54.5) | 13 (59.1) |                |                     | 3.43 (0.70-16.81) |
|            |            |          |                   |               | CC | 21 (23.9)           | 19 (28.8) | 2 (9.1)   |                |                     | 1                 |
| rs6595415  | 5          | q23.2    | 122234657         | <i>SNX24</i>  | TT | 12 (13.6)           | 9 (13.6)  | 3 (13.6)  | 0.100          | 2.33 (0.44-12.45)   |                   |
|            |            |          |                   |               | TC | 44 (50.0)           | 29 (43.9) | 15 (68.2) |                |                     | 3.62 (1.07-12.25) |
|            |            |          |                   |               | CC | 32 (36.4)           | 28 (42.4) | 4 (18.2)  |                |                     | 1                 |
| rs17149732 | 5          | q23.2    | 122249811         | <i>SNX24</i>  | TT | 12 (13.6)           | 9 (13.6)  | 3 (13.6)  | 0.100          | 2.33 (0.44-12.45)   |                   |
|            |            |          |                   |               | TG | 44 (50.0)           | 29 (43.9) | 15 (68.2) |                |                     | 3.62 (1.07-12.25) |
|            |            |          |                   |               | GG | 32 (36.4)           | 28 (42.4) | 4 (18.2)  |                |                     | 1                 |
| rs17149748 | 5          | q23.2    | 122295266         | <i>SNX24</i>  | CC | 12 (13.8)           | 9 (13.8)  | 3 (13.6)  | 0.149          | 2.17 (0.40-11.6)    |                   |
|            |            |          |                   |               | CT | 45 (51.7)           | 30 (46.2) | 15 (68.2) |                |                     | 3.25 (0.96-11.03) |
|            |            |          |                   |               | TT | 30 (34.5)           | 26 (40.0) | 4 (18.2)  |                |                     | 1                 |
| rs1038078  | 5          | q23.2    | 122309550         | <i>SNX24</i>  | AA | 12 (13.6)           | 9 (13.6)  | 3 (13.6)  | 0.130          | 2.25 (0.42-12.03)   |                   |
|            |            |          |                   |               | AG | 45 (51.1)           | 30 (45.5) | 15 (68.2) |                |                     | 3.38 (1.00-11.42) |
|            |            |          |                   |               | GG | 31 (35.2)           | 27 (40.9) | 4 (18.2)  |                |                     | 1                 |
| rs28891    | 5          | q23.2    | 122311523         | <i>SNX24</i>  | CC | 15 (17.0)           | 14 (21.2) | 1 (4.5)   | 0.072          | 0.11 (0.01-1.01)    |                   |
|            |            |          |                   |               | CT | 47 (53.4)           | 36 (54.5) | 11 (50.0) |                |                     | 0.49 (0.17-1.38)  |
|            |            |          |                   |               | TT | 26 (29.5)           | 16 (24.2) | 10 (45.5) |                |                     | 1                 |
| rs6595423  | 5          | q23.2    | 122341433         | <i>SNX24</i>  | CC | 11 (12.5)           | 9 (13.6)  | 2 (9.1)   | 0.060          | 1.56 (0.24-9.95)    |                   |
|            |            |          |                   |               | CT | 45 (51.1)           | 29 (43.9) | 16 (72.7) |                |                     | 3.86 (1.15-12.98) |
|            |            |          |                   |               | TT | 32 (36.4)           | 28 (42.4) | 4 (18.2)  |                |                     | 1                 |

*SNX24*, sorting nexin 24; SNP, single nucleotide polymorphism; CAA, Coronary artery aneurysm; CI, confidence interval.

*p*-values were obtained by chi-square test.

Statistical significance was considered as *p* value <0.006 (0.05/9).
